# Supplementary material for: NPRC deletion attenuates cardiac fibrosis in diabetic mice by activating PKA/PKG and inhibiting TGF-β1/Smad pathways
Source: PubMed Central journal article supplement — Sci Adv. 2023 Aug 2;9(31):eadd4222. doi: 10.1126/sciadv.add4222 (PMC10396312; doi:10.1126/sciadv.add4222), 2023-08-02
Supplement: sciadv.add4222_sm.pdf [file sciadv.add4222_sm.pdf]

Supplementary Materials for

**NPRC deletion attenuates cardiac fibrosis in diabetic mice by activating  
PKA/PKG and inhibiting TGF- $\beta$ 1/Smad pathways**

Linlin Meng *et al.*

Corresponding author: Yun Zhang, zhangyun@sdu.edu.cn; Cheng Zhang, zhangc@sdu.edu.cn

*Sci. Adv.* **9**, eadd4222 (2023)  
DOI: 10.1126/sciadv.add4222

**This PDF file includes:**

Figs. S1 to S22  
Tables S1 and S2

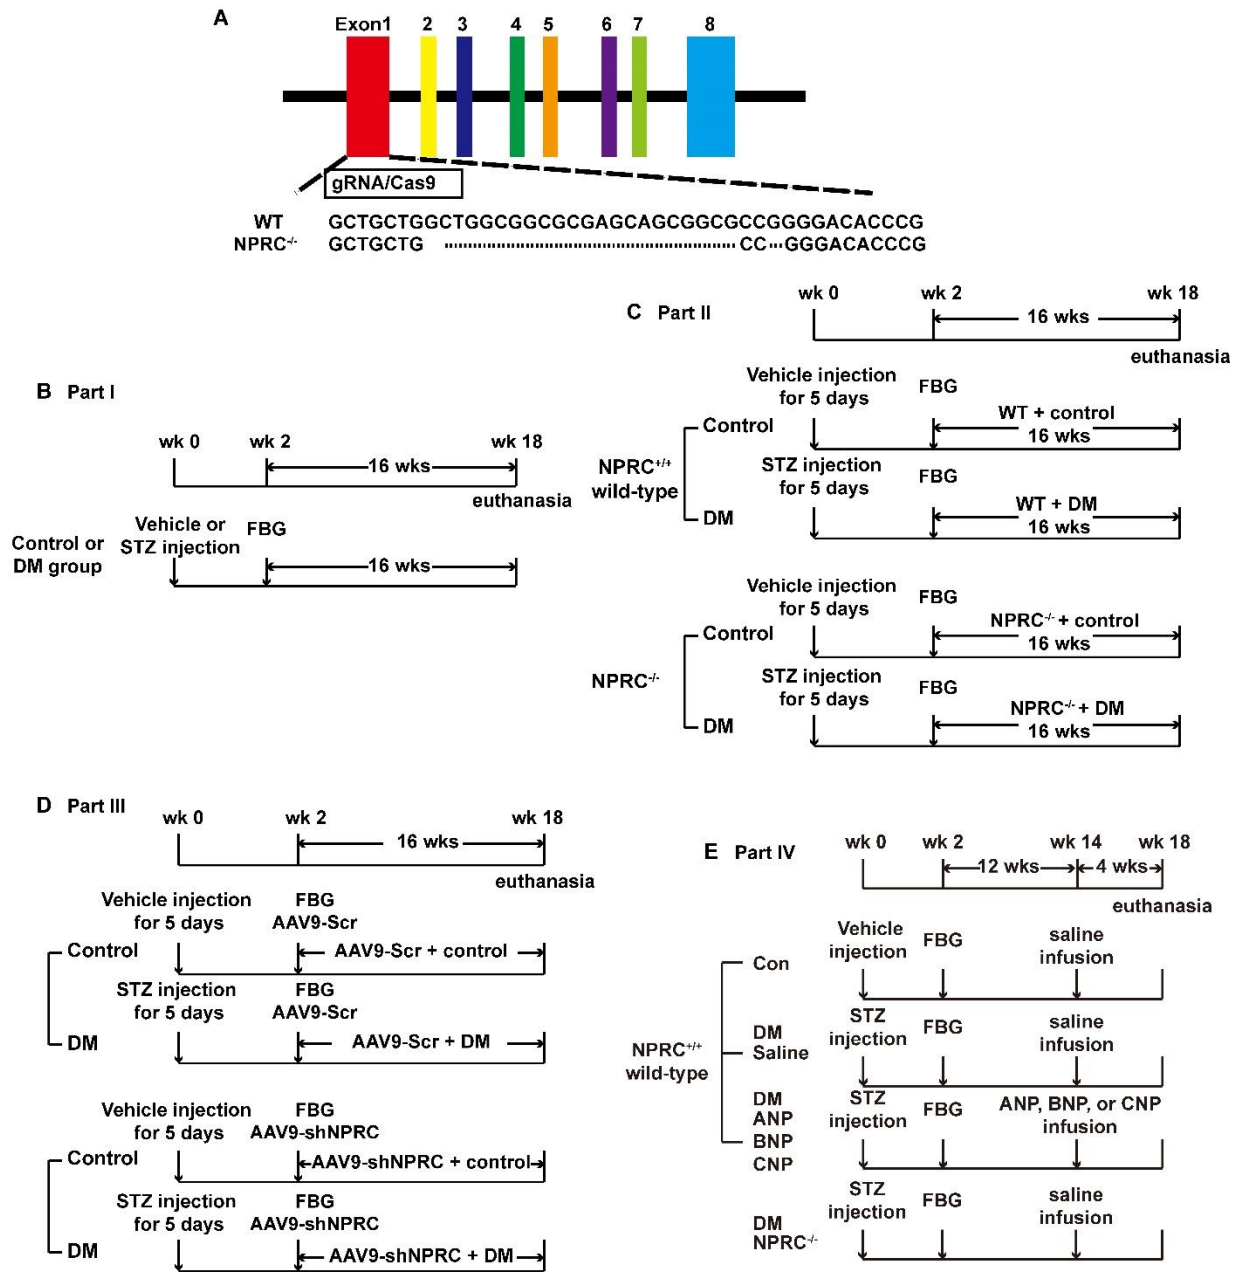

**Fig. S1. Generation of NPRC<sup>-/-</sup> mice and time line of the *in vivo* experiments. (A)** Schematic diagram of CRISPR/Cas9 for deletion of NPRC in mice. **(B-E)** Animal grouping and time line of the *in vivo* experiments. DM: diabetes mellitus; FBG: fasting blood glucose; wk: week.

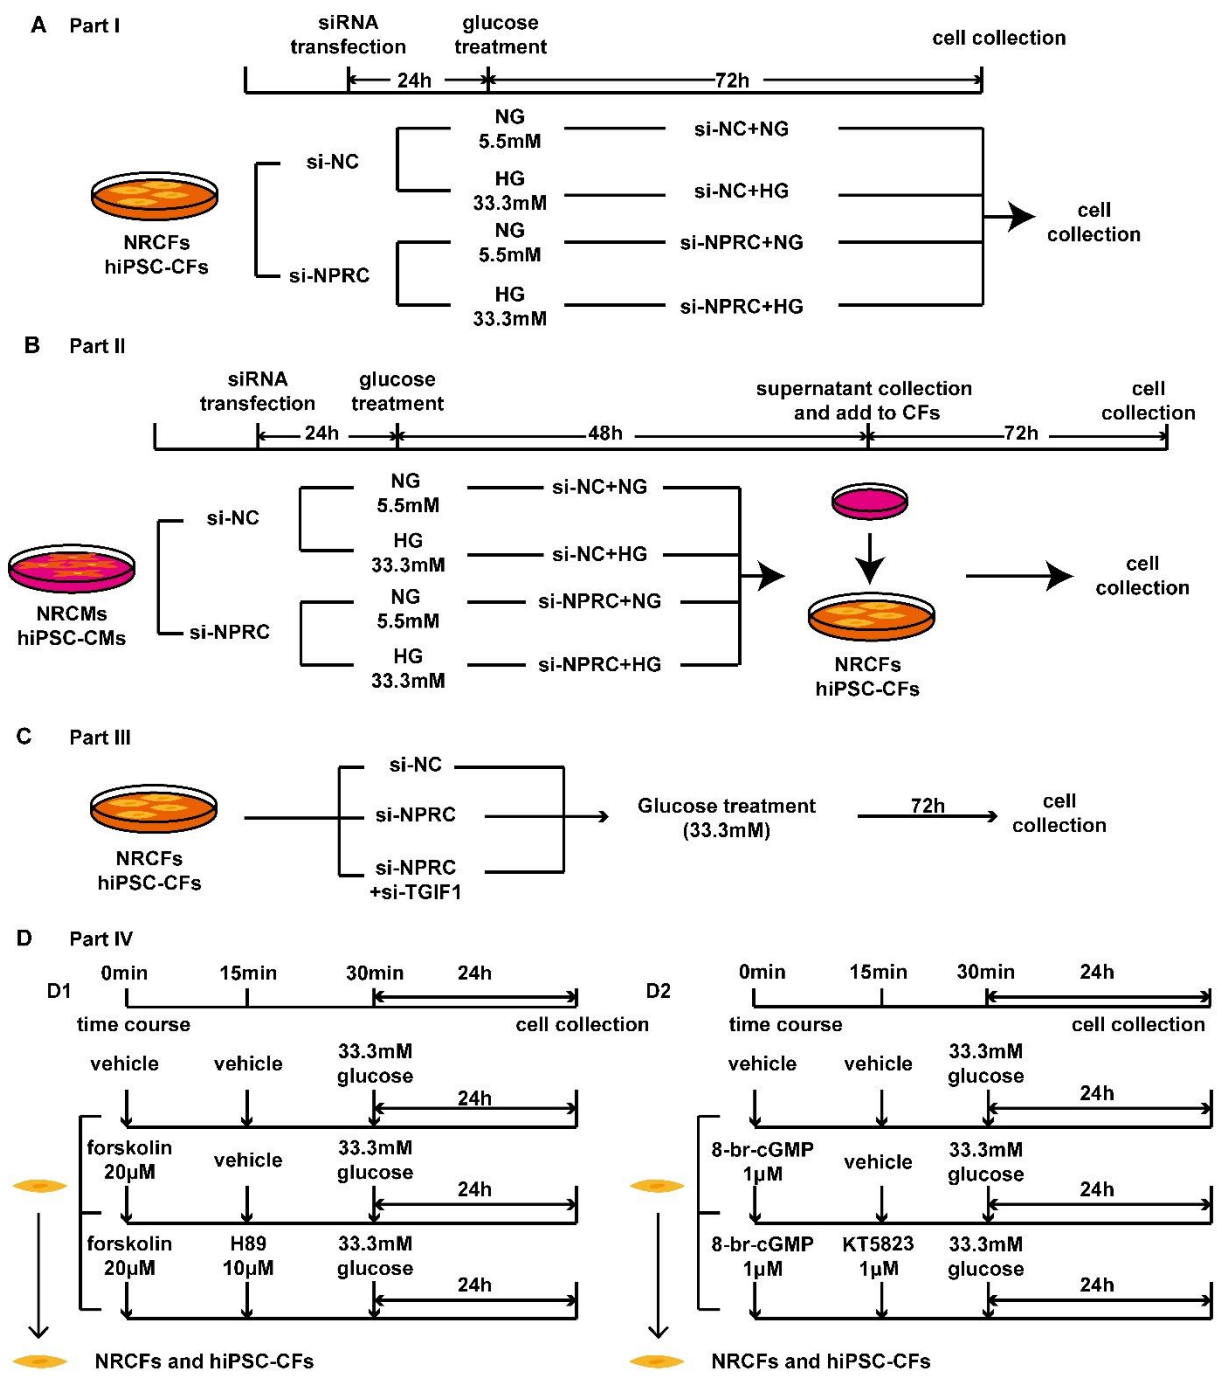

**Fig. S2. Cell grouping and time line of the *in vitro* experiments.** NG: normal glucose; HG: high glucose.

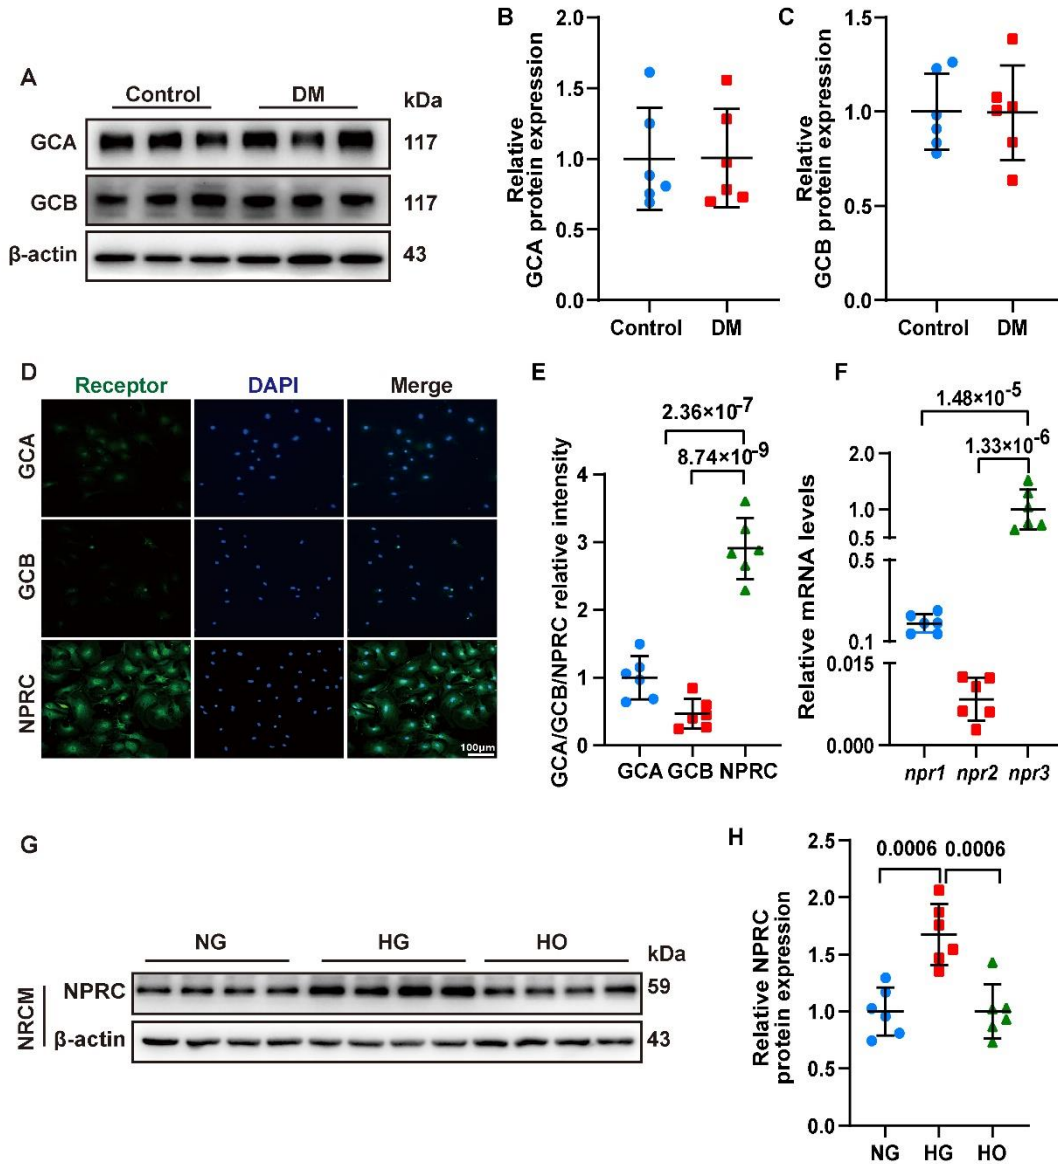

**Fig. S3. GCA and GCB expression in the hearts of diabetic mice and NPRs distribution in CFs.** (A) Representative Western blot images of GCA and GCB in the hearts from control or diabetic mice. (B) Quantification of the protein level of GCA in (A).  $n = 6$  per group. (C) Quantification of the protein level of GCB in (A).  $n = 6$  per group. (D) Representative immunofluorescence staining of GCA, GCB, and NPRC (green) in primary NRCFs. The nuclei were counterstained with DAPI (blue). Bar = 100  $\mu\text{m}$ . (E) Quantification of the relative immunofluorescence intensity of GCA, GCB, and NPRC in (D).  $n = 6$  per group. (F) Relative mRNA levels of *npr1*, *npr2*, and *npr3* in NRCFs.  $n = 6$

per group. **(G)**. Representative Western blot images of NPRC expression in NRCMs treated with normal concentration of glucose (NG), high concentration of glucose (HG) and high osmotic medium (HO). **(H)** Quantification of the protein expression of NPRC in **(G)**. n = 6 per group. DM: diabetes mellitus. Normal distributions were tested by Shapiro-Wilk method. Unpaired two-tailed Student's t tests were applied in **(B)** and **(C)**. One-way ANOVA was applied in **(E-F)** and **(H)**.

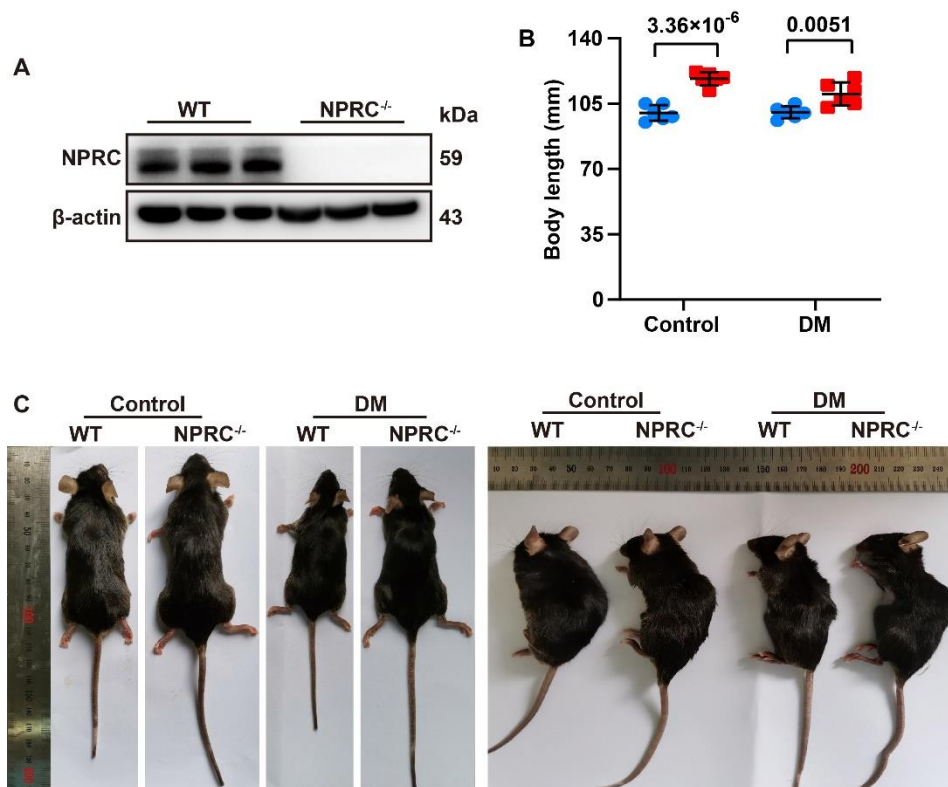

**Fig. S4. General phenotypes of NPRC<sup>-/-</sup> mice.** **(A)** Representative Western blot images of NPRC expression in the hearts of WT and NPRC<sup>-/-</sup> mice. **(B)** Comparison of body length among four groups of mice. n = 6 per group. **(C)** Representative photographs of WT and NPRC<sup>-/-</sup> mice in control and DM groups. Normal distributions were tested by Shapiro-Wilk method. Two-way ANOVA with Turkey's post-hoc test was used in **(B)**.

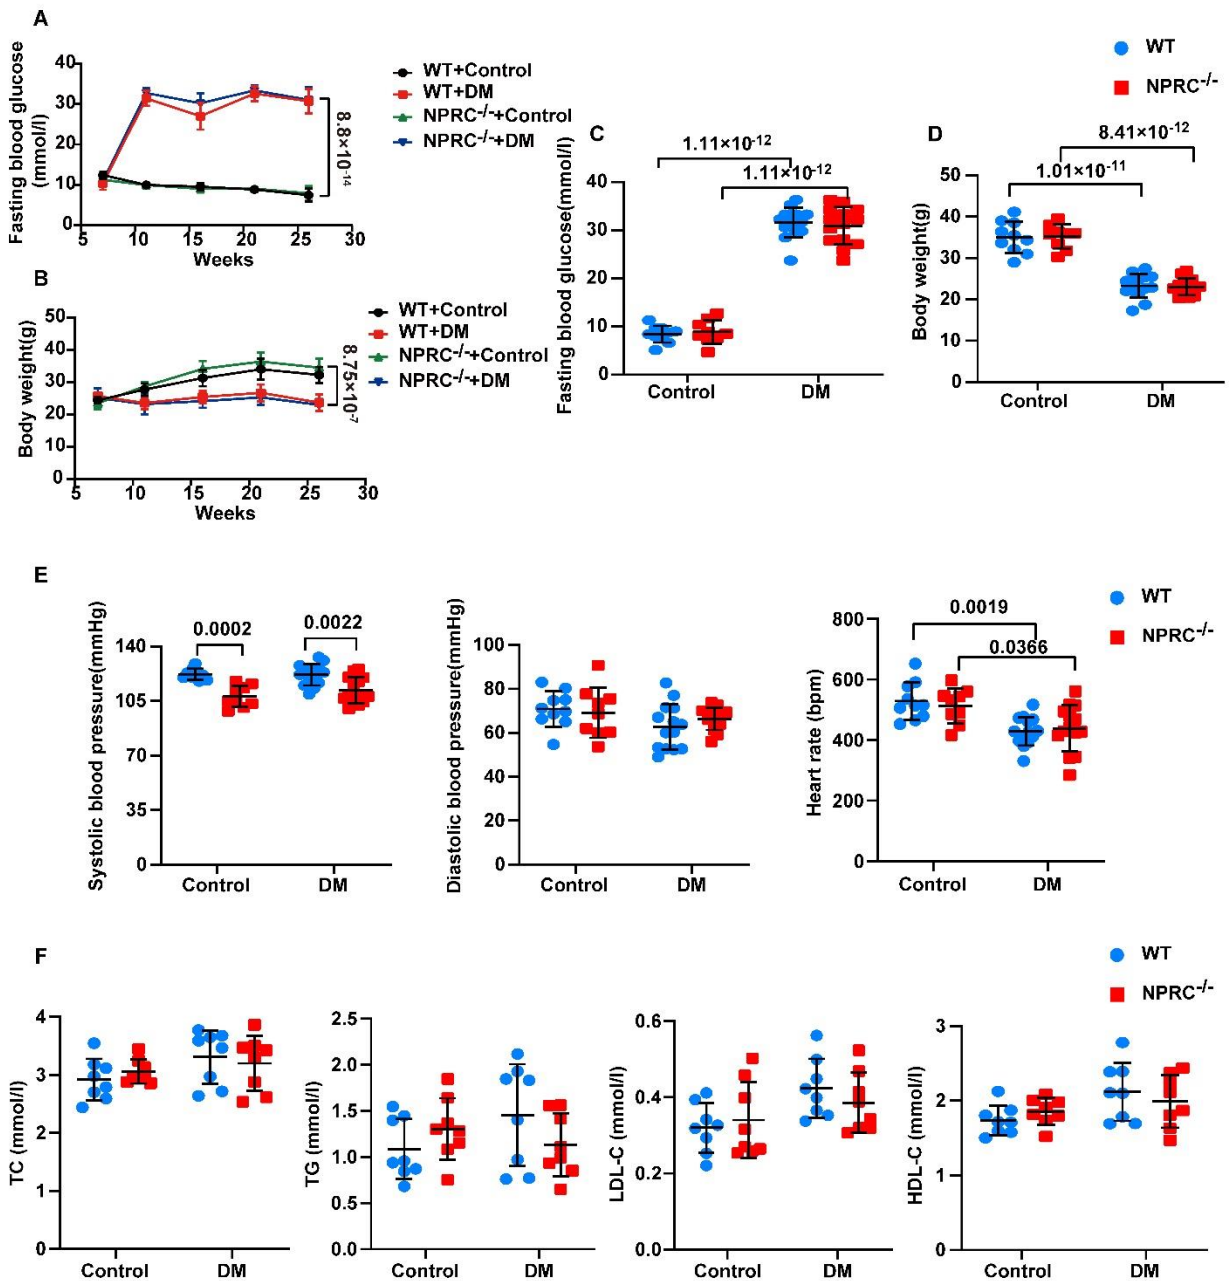

**Fig. S5. Characterization of WT and NPRC<sup>-/-</sup> mice in control and DM groups.** (A) Changes in fasting blood glucose in the four groups of mice during the experiment. n = 6 per group. (B) Changes in body weight in the four groups of mice during the experiment. n = 6 per group. (C) Comparison of fasting blood glucose among the four groups of mice before euthanasia. n = 9 to 14 per group. (D) Comparison of body weight among the four groups of mice before euthanasia. n = 9 to 14 per group. (E) Comparison of systolic blood

pressure, diastolic blood pressure, and heart rate among the four groups of mice. n = 9 to 14 per group. (F) Comparison of serum levels of total cholesterol (TC), triglycerides (TG), low-density lipoprotein cholesterol (LDL-C), and high-density lipoprotein cholesterol (HDL-C) among the four groups of mice. n = 8 per group. DM: diabetes mellitus; TC: total cholesterol; TG: triglycerides; LDL-C: low-density lipoprotein cholesterol; HDL-C: high-density lipoprotein cholesterol. Normal distributions were tested by Shapiro-Wilk method. Two-way ANOVA with Bonferroni post-hoc test was used in (A-F).

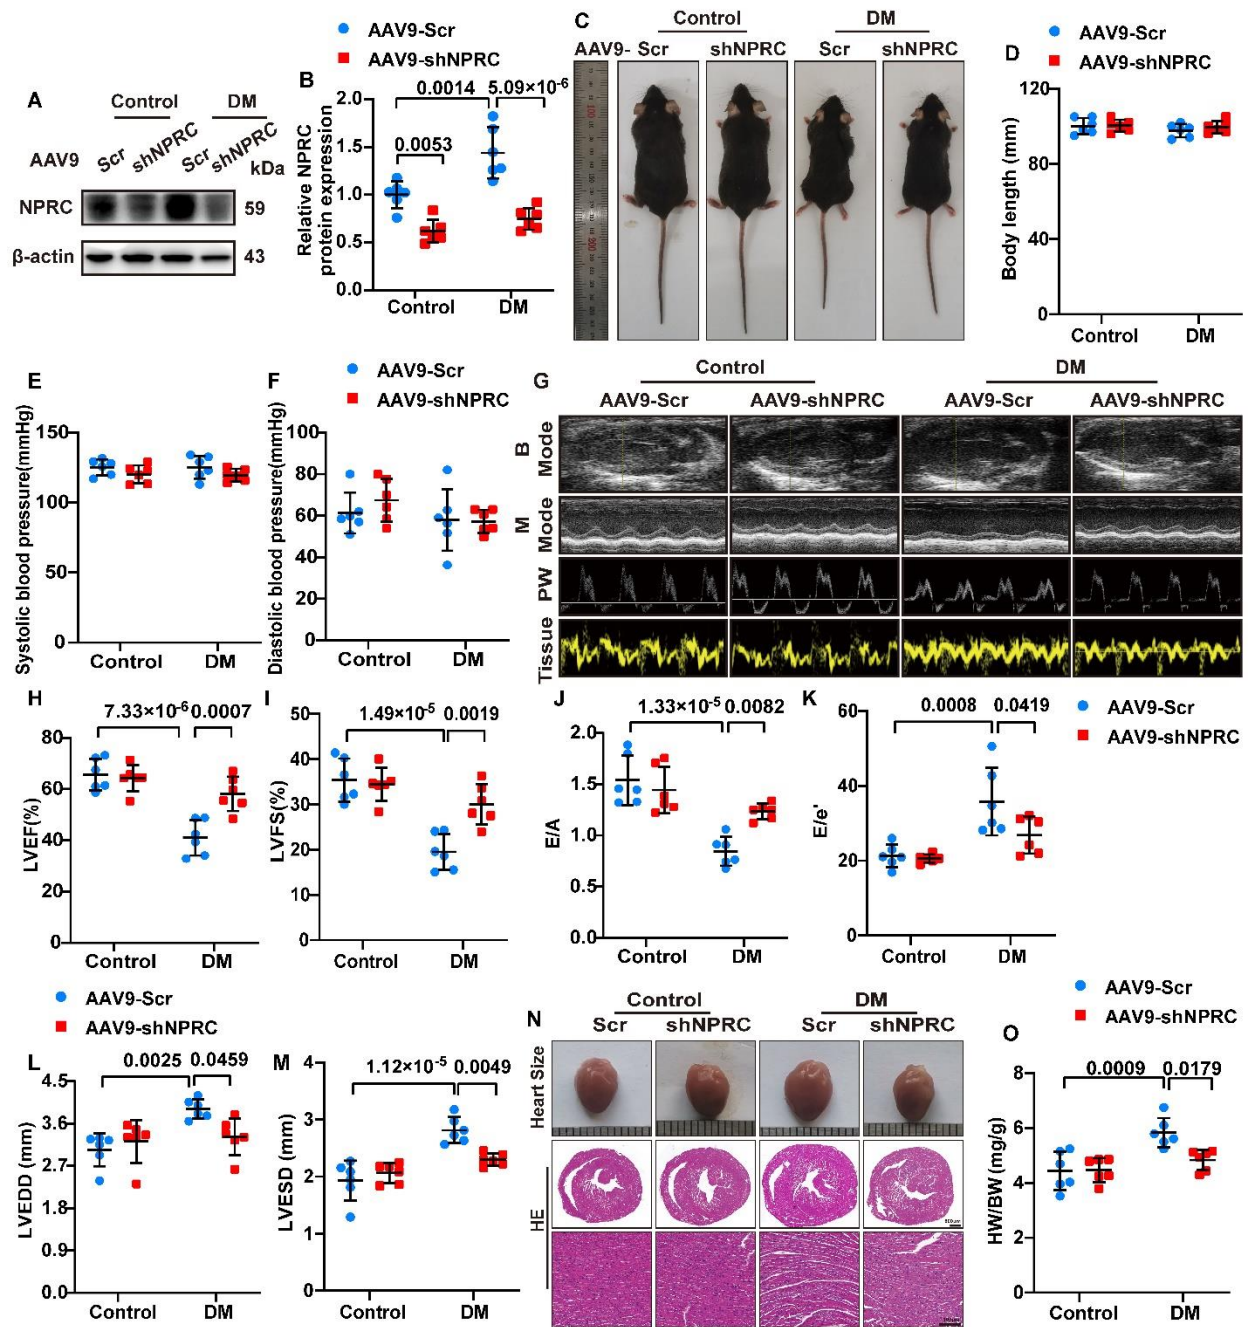

**Fig. S6. Cardiac NPRC knockdown by AAV improved left ventricular function and remodeling in diabetic mice.** (A) Representative Western blot images of NPRC in the hearts of four groups of AAV-delivered mice. (B) Quantification of the protein expression of NPRC in (A).  $n = 6$  per group. (C) Representative photographs of AAV9-Scr or AAV9-shNPRC delivered mice in control and DM groups. (D) Comparison of body length among the four groups of mice.  $n = 6$  per group. (E) Comparison of systolic blood pressure among



the four groups of mice.  $n = 6$  per group. **(F)** Comparison of diastolic blood pressure among the four groups of mice.  $n = 6$  per group. **(G)** Representative echocardiographic images for four groups of mice. B Mode represents a two-dimensional echocardiogram showing left ventricular long-axis view, M Mode represents M-mode echocardiogram showing left ventricular dimensions, PW represents pulse-wave Doppler spectrum depicting diastolic mitral flow, and Tissue represents tissue Doppler spectrum displaying mitral annular velocities. **(H)** Quantification of left ventricular ejection fraction (LVEF) in four groups of mice.  $n = 6$  per group. **(I)** Quantification of left ventricular fractional shortening (LVFS) in four groups of mice.  $n = 6$  per group. **(J)** Quantification of the ratio of early to late diastolic mitral flow velocities (E/A) in four groups of mice.  $n = 6$  per group. **(K)** Quantification of the ratio of early diastolic mitral flow to early diastolic mitral annular velocities (E/e') in four groups of mice.  $n = 6$  per group. **(L)** Quantification of left ventricular end-diastolic diameter (LVEDD) in four groups of mice.  $n = 6$  per group. **(M)** Quantification of left ventricular end-systolic diameter (LVESD) in four groups of mice.  $n = 6$  per group. **(N)** Representative photographs of the hearts from four groups of mice (the first row), cross-sectional images of hematoxylin and eosin (H&E) staining at the papillary muscle level of the hearts (the second row, bar = 500  $\mu\text{m}$ ), and H&E-stained sections of hearts from four groups of mice (the third row, bar = 100  $\mu\text{m}$ ). **(O)** Quantification of the ratio of heart weight (HW) to body weight (BW) in four groups of mice.  $n = 6$  per group. PW: pulse-wave; DM: diabetes mellitus. Normal distributions were tested by Shapiro-Wilk method. Two-way ANOVA with Bonferroni post-hoc test was used in **(B)**. Two-way ANOVA with Turkey's post-hoc test was used in **(D-F)**, **(H-M)** and **(O)**.

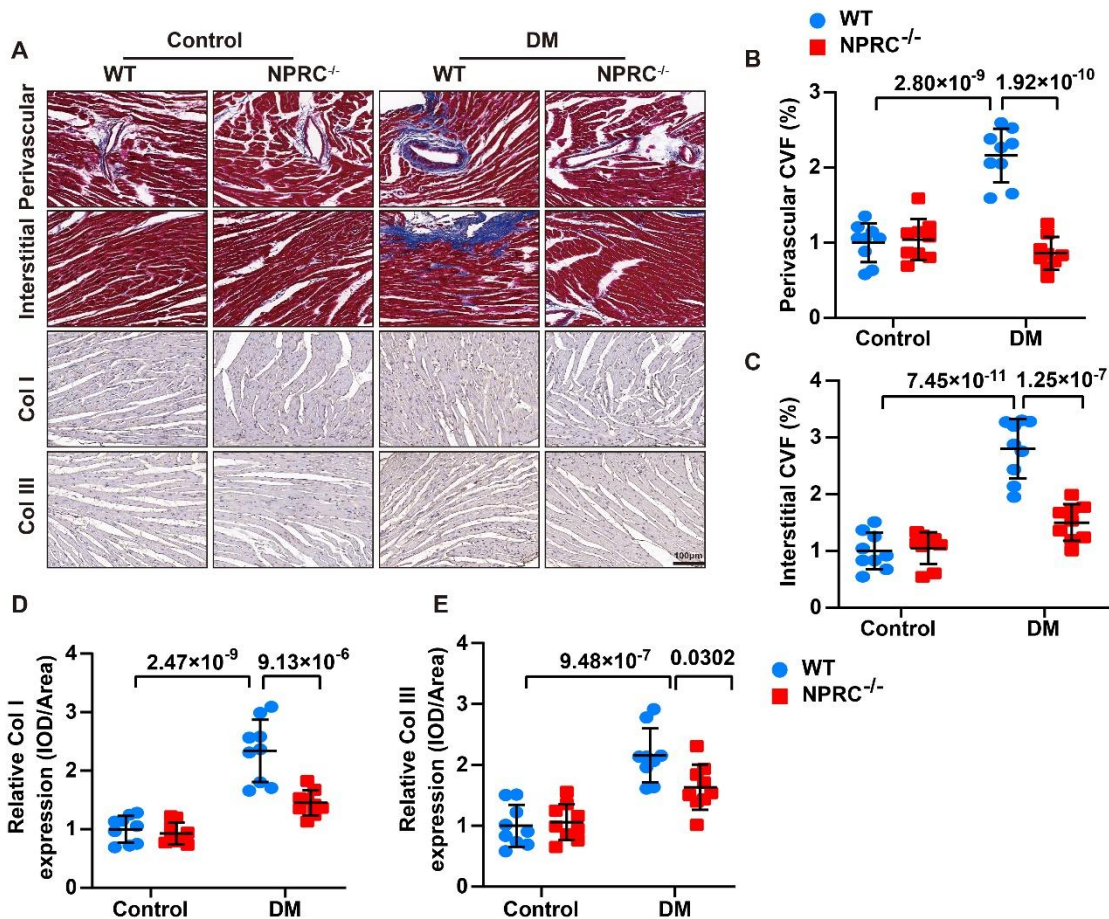

**Fig. S7. NPRC deficiency alleviated left atrial fibrosis induced by diabetes *in vivo*.**

(A) Representative images of Masson's trichrome staining of the left atrial myocardium (the first and second row) and IHC of collagen I and collagen III in the left atrial myocardium (the third and fourth row) of four groups of mice. Bar = 100  $\mu$ m. (B-C) Quantification of perivascular collagen volume fraction (CVF) and interstitial CVF in the left atrium of four groups of mice. n = 9 per group. (D-E) Quantification of IHC of collagen I and collagen III in the left atrium of four groups of mice. n = 9 per group. DM: diabetes mellitus. Normal distributions were tested by Shapiro-Wilk method. Two-way ANOVA with Turkey's post-hoc test was used in (B-D). Two-way ANOVA with Bonferroni post-hoc test was used in (E).

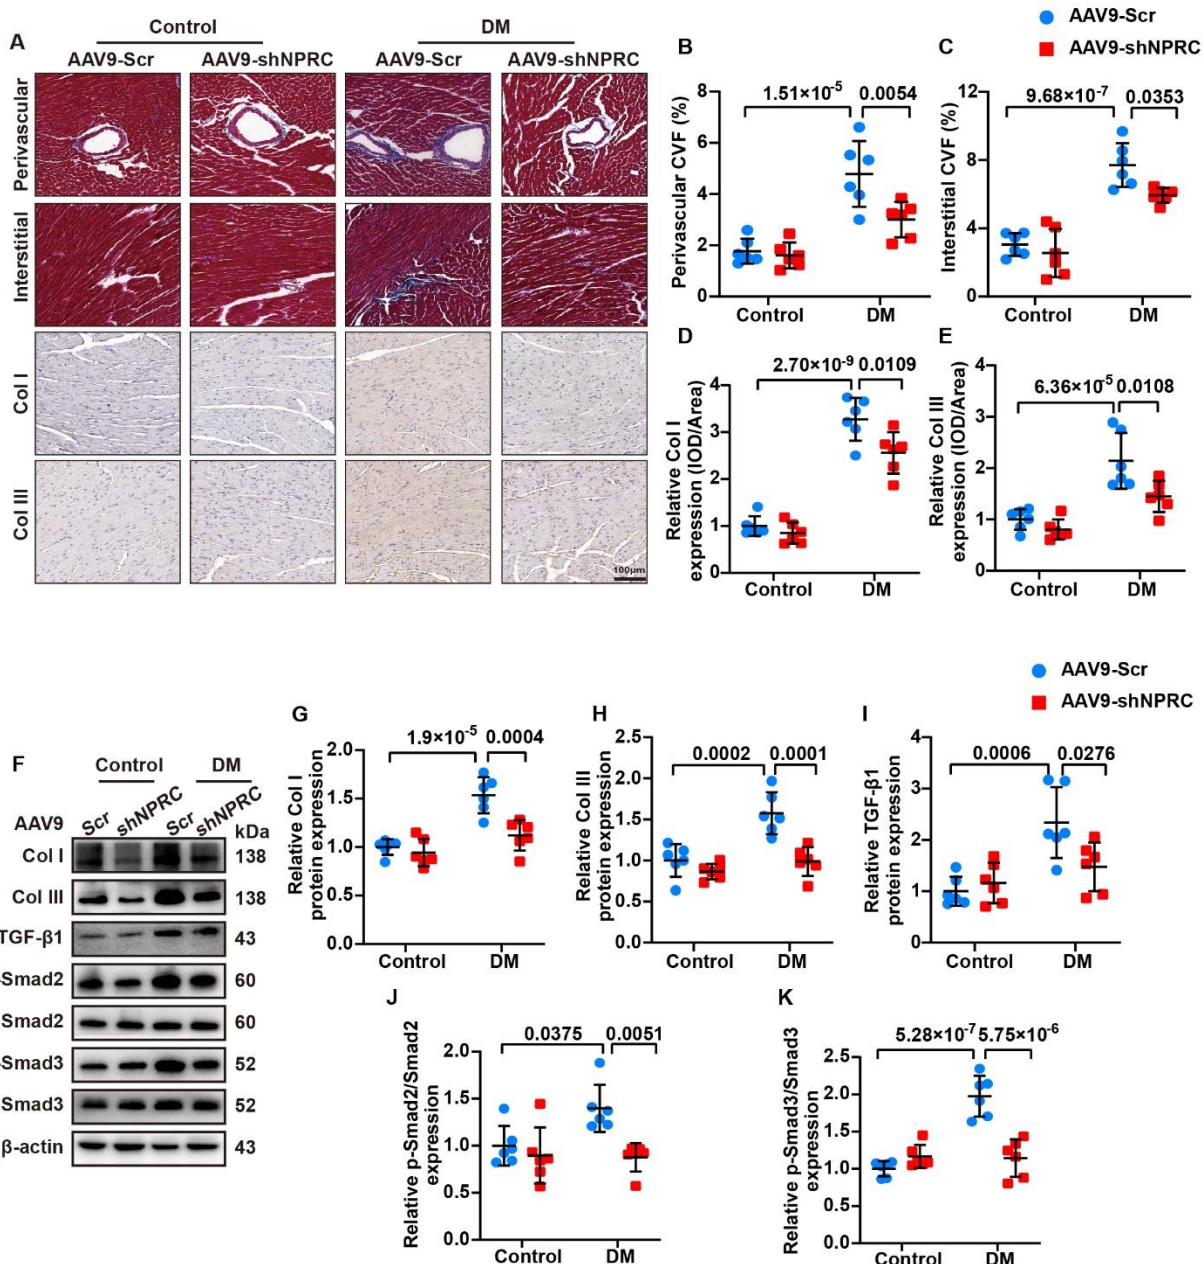

**Fig. S8. Cardiac NPRC knockdown by AAV alleviated cardiac fibrosis induced by diabetes *in vivo*.** (A). Representative images of Masson's trichrome staining of the myocardium (the first and second row) and immunohistochemistry (IHC) of collagen I and collagen III in the myocardium (the third and fourth row) in four groups of AAV-delivered mice. Bar = 100  $\mu$ m. (B). Quantification of perivascular collagen volume fraction (CVF) in four groups of mice. n = 6 per group. (C) Quantification of interstitial CVF in four groups

of mice. n = 6 per group. **(D)** Quantification of IHC of collagen I in four groups of mice. n = 6 per group. **(E)** Quantification of IHC of collagen III in four groups of mice. n = 6 per group. **(F)** Representative Western blot images of collagen I, collagen III, TGF- $\beta$ 1, p-Smad2, and p-Smad3 in the hearts of four groups of mice. **(G-K)** Quantification of the protein expression of collagen I, collagen III, TGF- $\beta$ 1, p-Smad2, and p-Smad3 in **(F)**. n = 6 per group. DM: diabetes mellitus; Col I: Collagen I; Col III: Collagen III; CVF: collagen volume fraction; IOD: integrated optical density. Normal distributions were tested by Shapiro-Wilk method. Two-way ANOVA with Bonferroni post-hoc test was used in **(B-E)** and **(G-K)**.

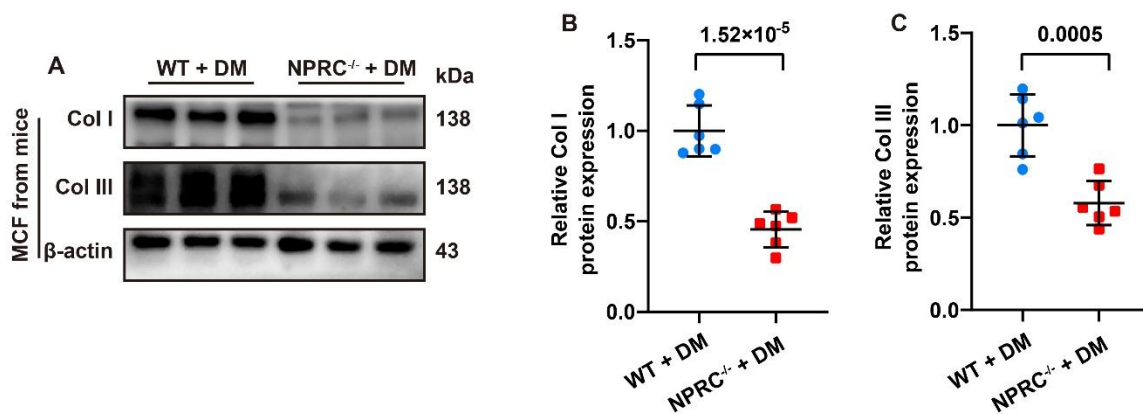

**Fig. S9. NPRC deficiency decreased collagen synthesis in adult mouse CFs (MCFs).** **(A)**. Representative Western blot images of collagen I and collagen III of adult MCFs isolated from the hearts of diabetic WT and NPRC<sup>-/-</sup> mice. **(B-C)**. Quantification of the protein expression of collagen I and collagen III in **(A)**. n = 6 per group. DM: diabetes mellitus; Col I: Collagen I; Col III: Collagen III. Normal distributions were tested by Shapiro-Wilk method. Unpaired two-tailed Student's t tests were applied in **(B and C)**.

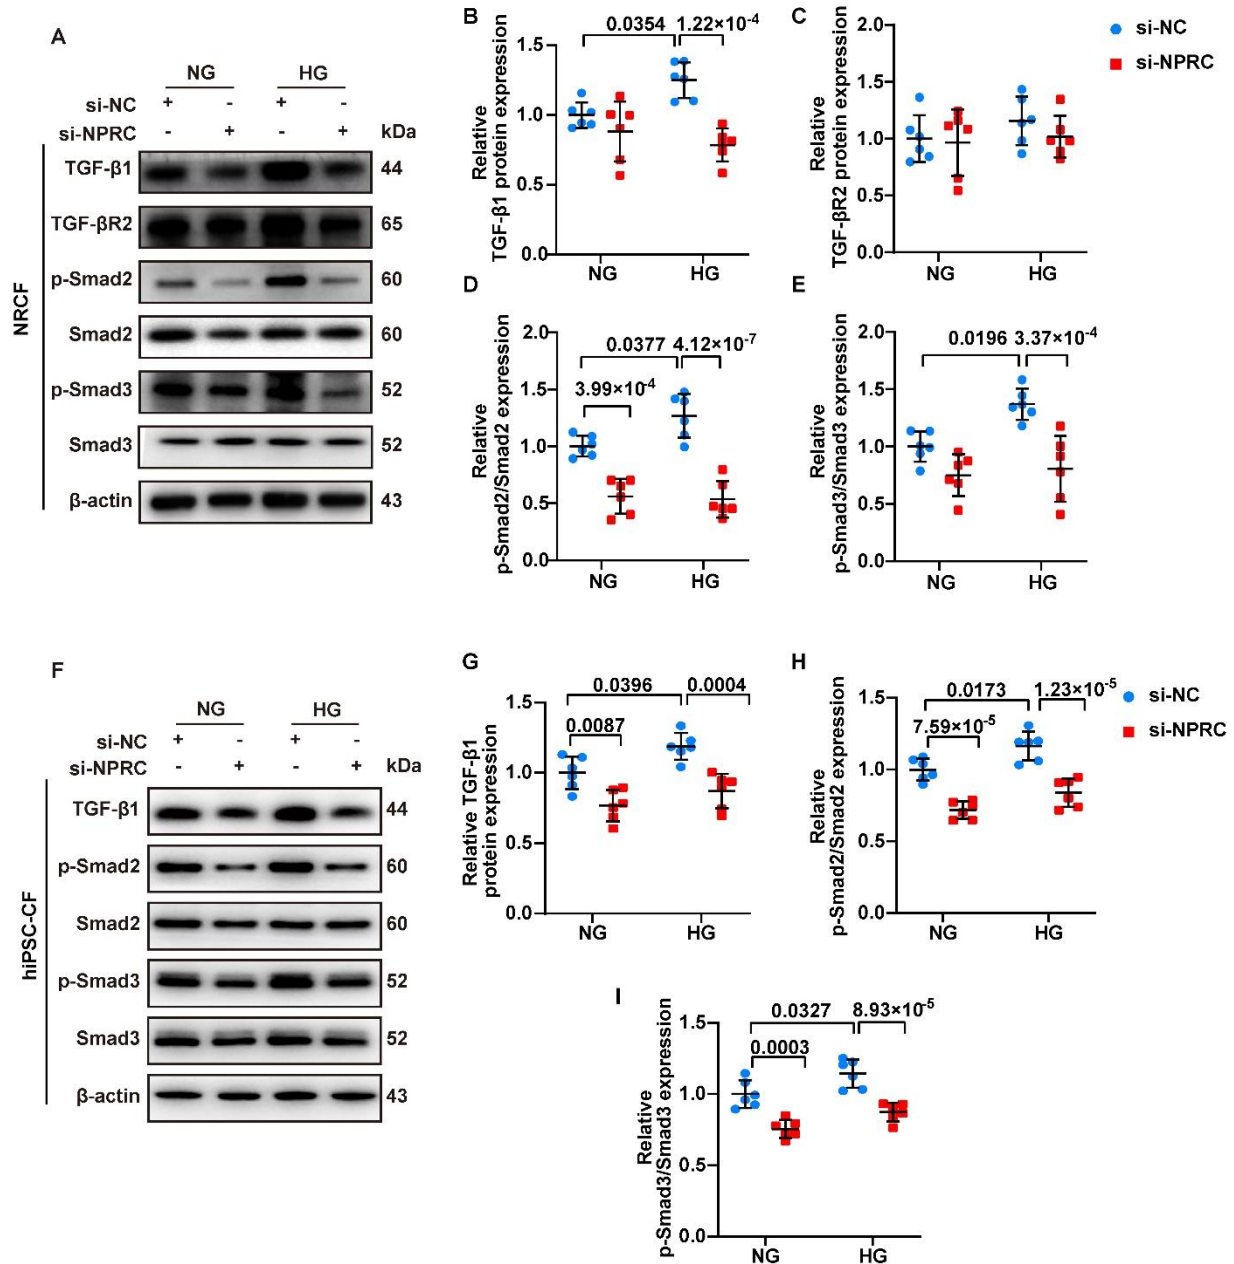

**Fig. S10. NPRC deficiency inhibited TGF- $\beta$ 1/Smad signaling in CFs *in vitro*.** (A) Representative Western blot images of TGF- $\beta$ 1, TGF- $\beta$ R2, p-Smad2, and p-Smad3 expression in NRCFs transfected with si-NC or si-NPRC and treated with NG (5.5 mM) or HG (33.3 mM). (B-E) Quantification of the protein expression of TGF- $\beta$ 1, TGF- $\beta$ R2, p-Smad2, and p-Smad3 in (A). n = 6 per group. (F) Representative Western blot images of TGF- $\beta$ 1, p-Smad2, and p-Smad3 expression in hiPSC-CFs transfected with si-NC or si-NPRC and treated with NG or HG. (G-I) Quantification of the protein expression of TGF-

$\beta$ 1, p-Smad2, and p-Smad3 in (F). n = 6 per group. NG: normal glucose; HG: high glucose. Normal distributions were tested by Shapiro-Wilk method. Two-way ANOVA with Turkey's post-hoc test was used in (B, D). Two-way ANOVA with Bonferroni post-hoc test was used in (C, E, G-I).

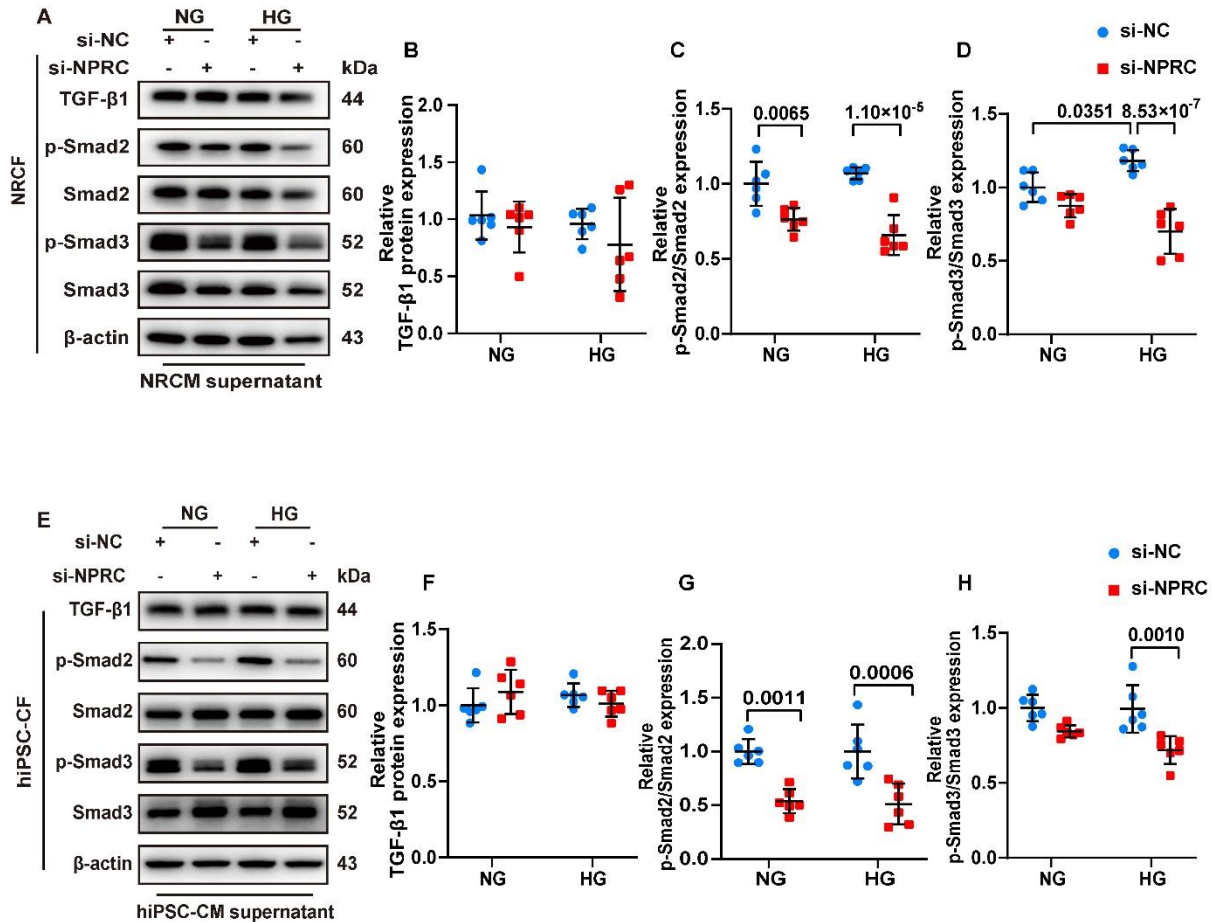

**Fig. S11. NPRC deficiency in CMs inhibited TGF- $\beta$ 1/Smad signaling in CFs *in vitro*.**

(A) Representative Western blot images of TGF- $\beta$ 1, p-Smad2, and p-Smad3 expression in NRCFs treated with the supernatant of NRCMs that were transfected with si-NC or si-NPRC and treated with NG (5.5 mM) or HG (33.3 mM). (B-D) Quantification of the protein expression of TGF- $\beta$ 1, p-Smad2, and p-Smad3 in (A). n = 6 per group. (E) Representative Western blot images of TGF- $\beta$ 1, p-Smad2, and p-Smad3 expression in hiPSC-CFs treated with the supernatant of hiPSC-CMs that were transfected with si-NC or si-NPRC and treated with NG or HG. (F-H) Quantification of the protein expression of TGF- $\beta$ 1, p-Smad2, and p-Smad3 in (E). n = 6 per group. NG: normal glucose; HG: high glucose.

Normal distributions were tested by Shapiro-Wilk method. Two-way ANOVA with Turkey's post-hoc test was used in (D). Two-way ANOVA with Bonferroni post-hoc test was used in (B-C, F-H).

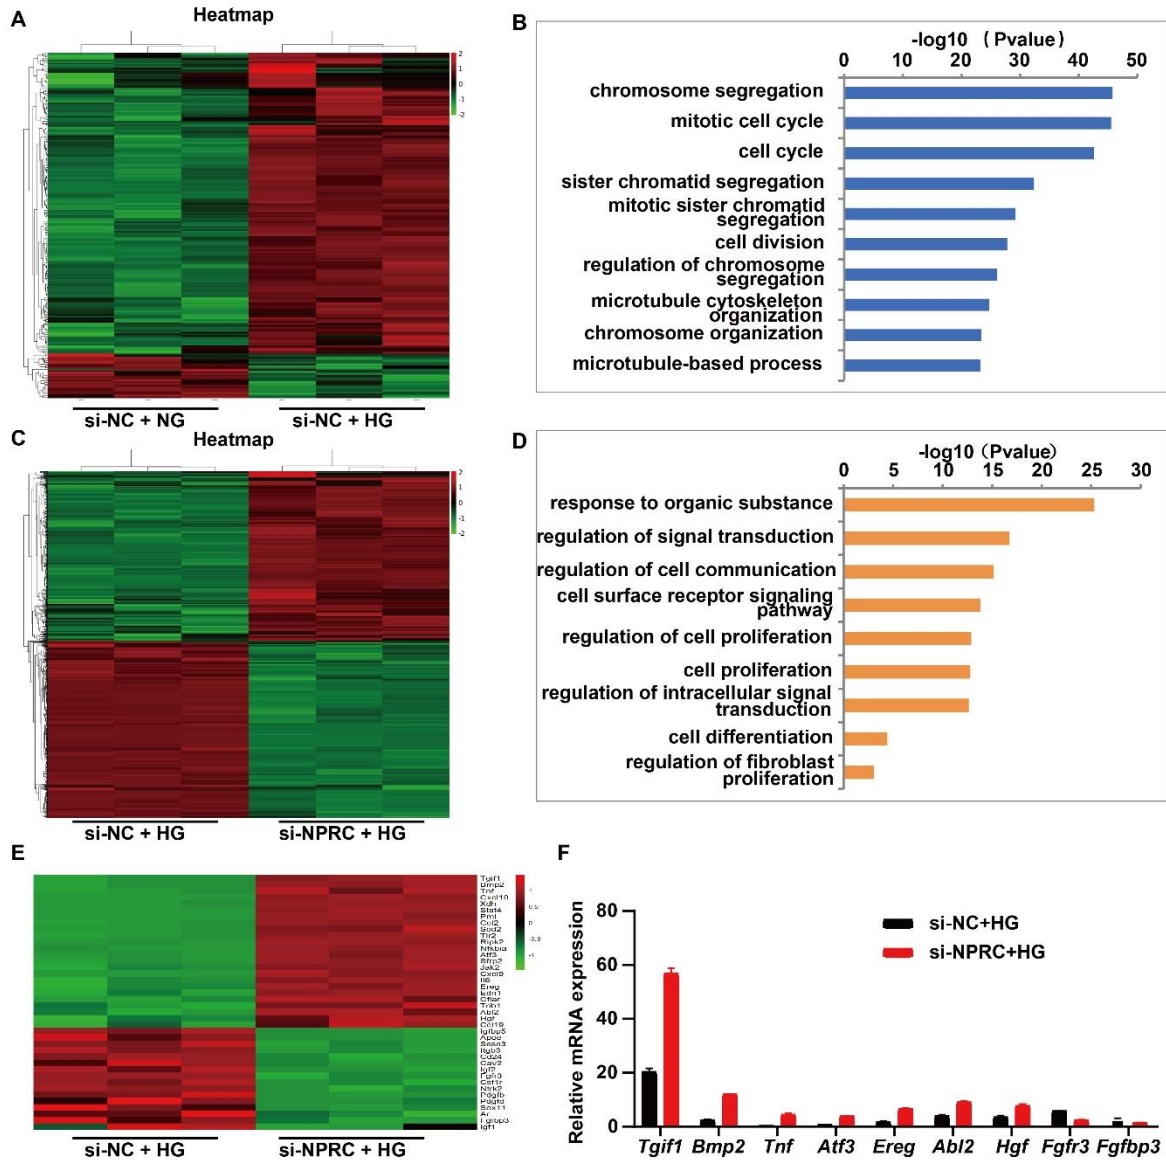

**Fig. S12. Transcriptome profiles of the NRCFs transfected with si-NC or si-NPRC.** (A) Hierarchical clustering heatmap of the differentially expressed genes in NRCFs treated with si-NC + NG or si-NC + HG. (B) Gene ontology (GO) enrichment of the differentially expressed genes in NRCFs treated with si-NC + NG or si-NC + HG. (C) Hierarchical clustering heatmap of the differentially expressed genes in NRCFs treated with si-NC + HG or si-NPRC + HG. (D) GO enrichment of the differentially expressed

genes in NRCFs treated with si-NC + HG or si-NPRC + HG. (E) Heatmap of the frequently repeated genes in GO enrichment in (D). (F) Relative mRNA expression and fold changes of fibrosis-related genes in (E). NG: normal glucose; HG: high glucose.

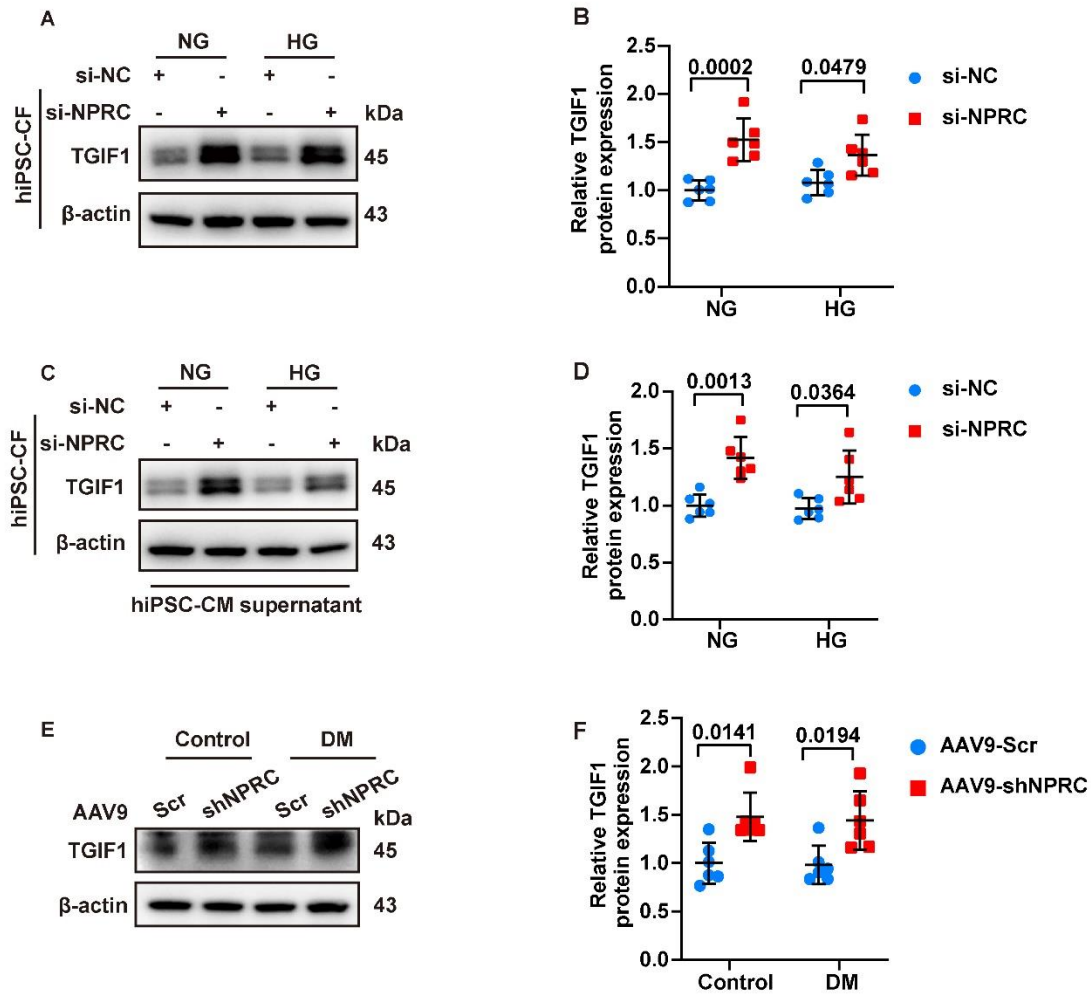

**Fig. S13. NPRC deficiency increased TGIF1 expression *in vitro* and *in vivo*.** (A-B) Representative Western blot images and quantification of the protein expression of TGIF1 in hiPSC-CFs transfected with si-NC or si-NPRC and treated with NG or HG. n = 6 per group. (C-D) Representative Western blot images and quantification of the protein expression of TGIF1 in hiPSC-CFs treated with the supernatant of hiPSC-CMs. n = 6 per group. (E-F) Representative Western blot images and quantification of the protein expression of TGIF1 in the hearts of AAV9-delivered mice. n = 6 per group. NG: normal



glucose; HG: high glucose. Normal distributions were tested by Shapiro-Wilk method. Two-way ANOVA with Bonferroni post-hoc test was used in (B, D, and F).

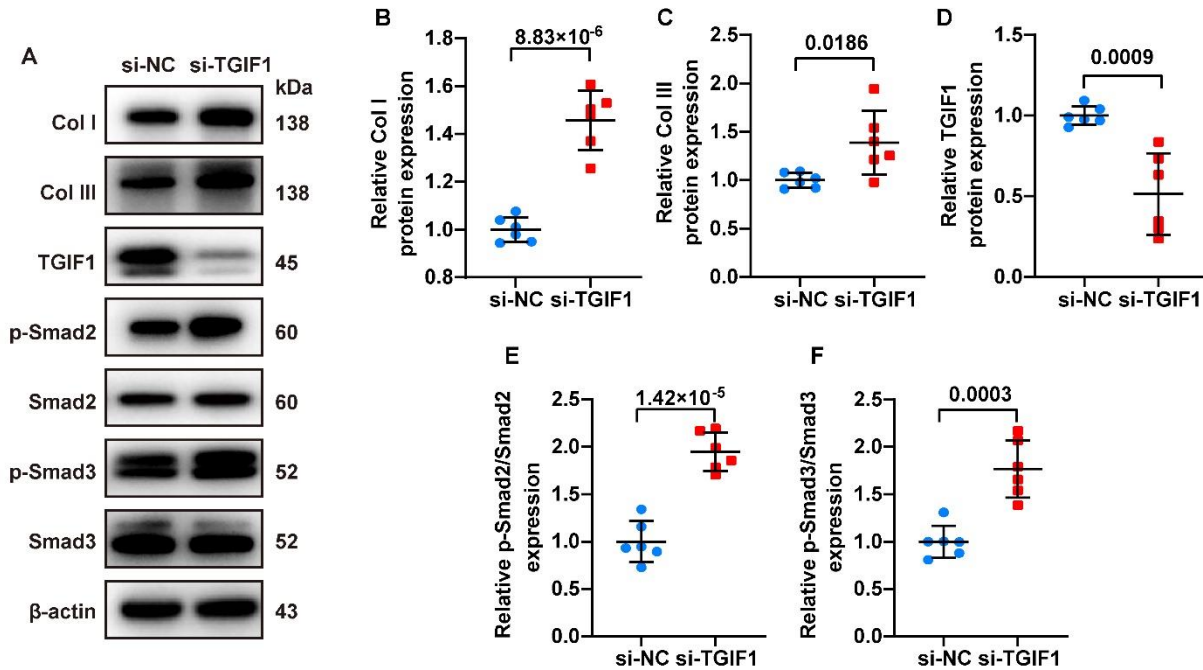

**Fig. S14. Effect of TGIF1 knockdown on collagen synthesis and phosphorylation levels of Smad2/3 in NRCFs.** (A) Representative Western blot images of collagen I, collagen III, TGIF1, p-Smad2, and p-Smad3 expression in NRCFs transfected with si-NC or si-TGIF1. (B-F) Quantification of the protein expression of collagen I, collagen III, TGIF1, p-Smad2, and p-Smad3 in NRCFs in (A). n = 6 per group. Normal distributions were tested by Shapiro-Wilk method. Unpaired two-tailed Student's t tests were applied in (B-F).

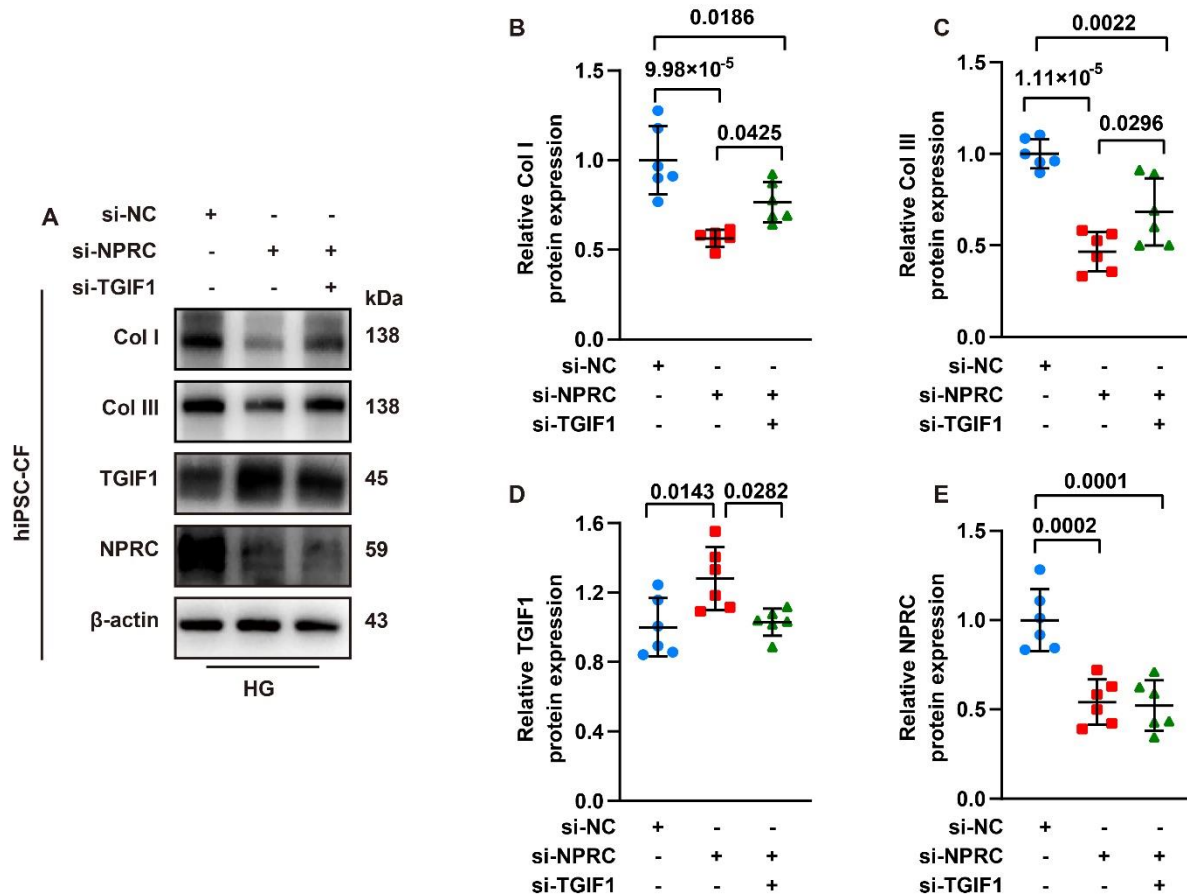

**Fig. S15. TGIF1 mediated the effects of NPRC deficiency on collagen synthesis in hiPSC-CFs. (A).** Representative Western blot images of collagen I, collagen III, TGIF1, and NPRC expression in hiPSC-CFs transfected with si-NC, si-NPRC, or si-NPRC + si-TGIF1. **(B-E)** Quantification of the protein expression of collagen I, collagen III, TGIF1, and NPRC in **(A)**.  $n = 6$  per group. Col I: Collagen I; Col III: Collagen III; Normal distributions were tested by Shapiro-Wilk method. One-way ANOVA was applied in **(B-E)**.

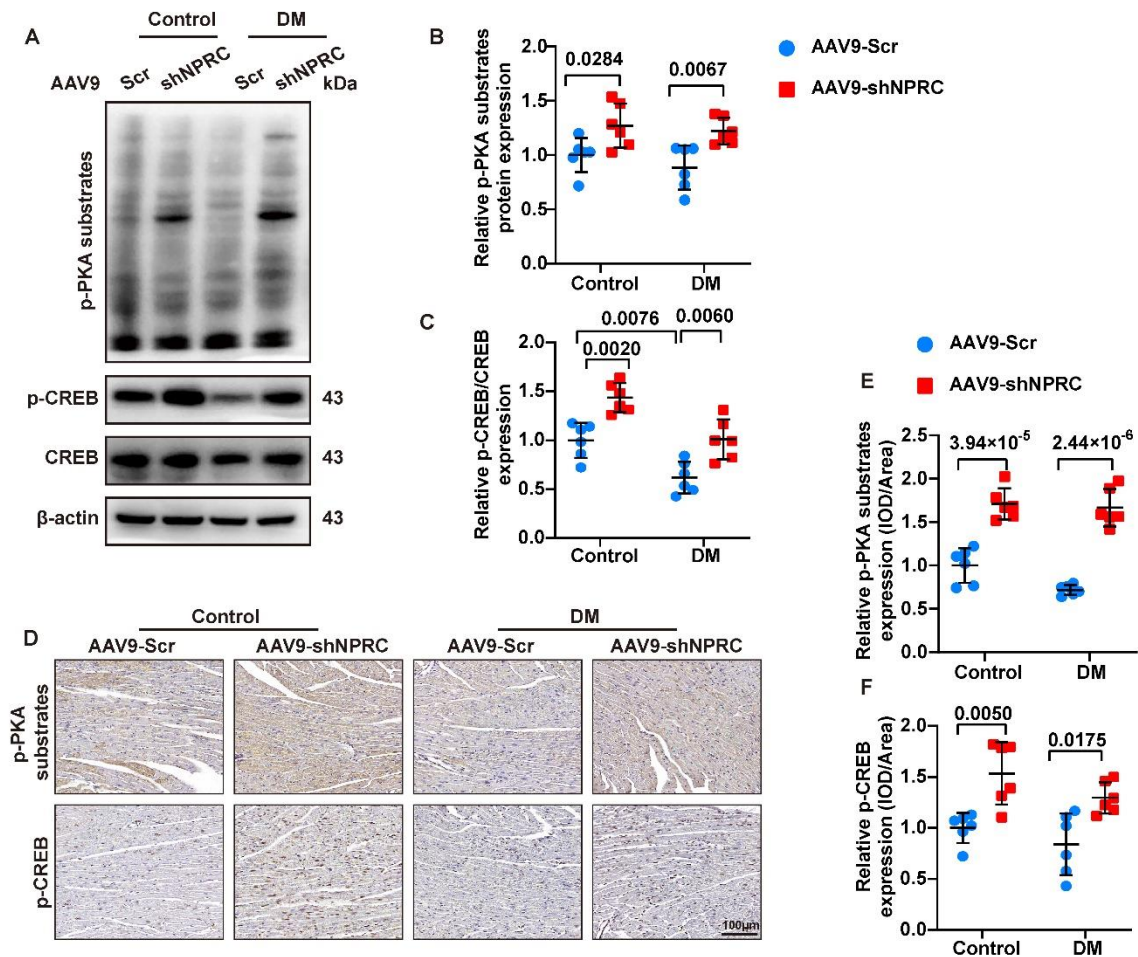

**Fig. S16. Cardiac NPRC knockdown by AAV activated cAMP/PKA signaling *in vivo*.**

(A). Representative Western blot images of p-PKA substrates and p-CREB expression in the hearts of AAV9-delivered mice. (B-C) Quantification of the protein expression of p-PKA substrates and p-CREB in (A).  $n = 6$  per group. (D) Representative IHC images of p-PKA substrates and p-CREB expression in the hearts of AAV9-delivered mice. Bar = 100  $\mu\text{m}$ . (E-F) Quantification of the protein expression of p-PKA substrates and p-CREB in (D).  $n = 6$  per group. DM: diabetes mellitus. Normal distributions were tested by Shapiro-Wilk method. Two-way ANOVA with Bonferroni post-hoc test was used in (B-C), and (E-F).

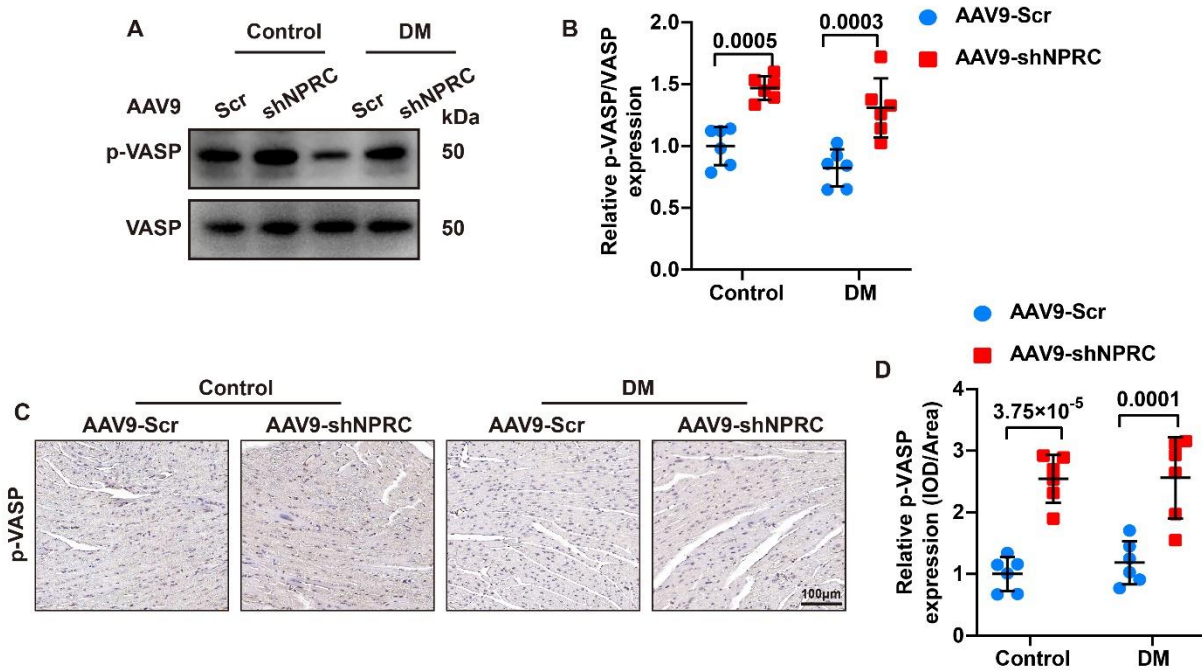

**Fig. S17. Cardiac NPRC knockdown by AAV activated cGMP/PKG signaling *in vivo*.**

(A). Representative Western blot images of p-VASP expression in the hearts of AAV9-delivered mice. (B) Quantification of the protein expression of p-VASP in (A).  $n = 6$  per group. (C) Representative IHC images of p-VASP expression in the hearts of AAV9-delivered mice. Bar = 100  $\mu\text{m}$ . (D) Quantification of the protein expression of p-VASP in (C).  $n = 6$  per group. DM: diabetes mellitus. Normal distributions were tested by Shapiro-Wilk method. Two-way ANOVA with Bonferroni post-hoc test was used in (B), and (D).

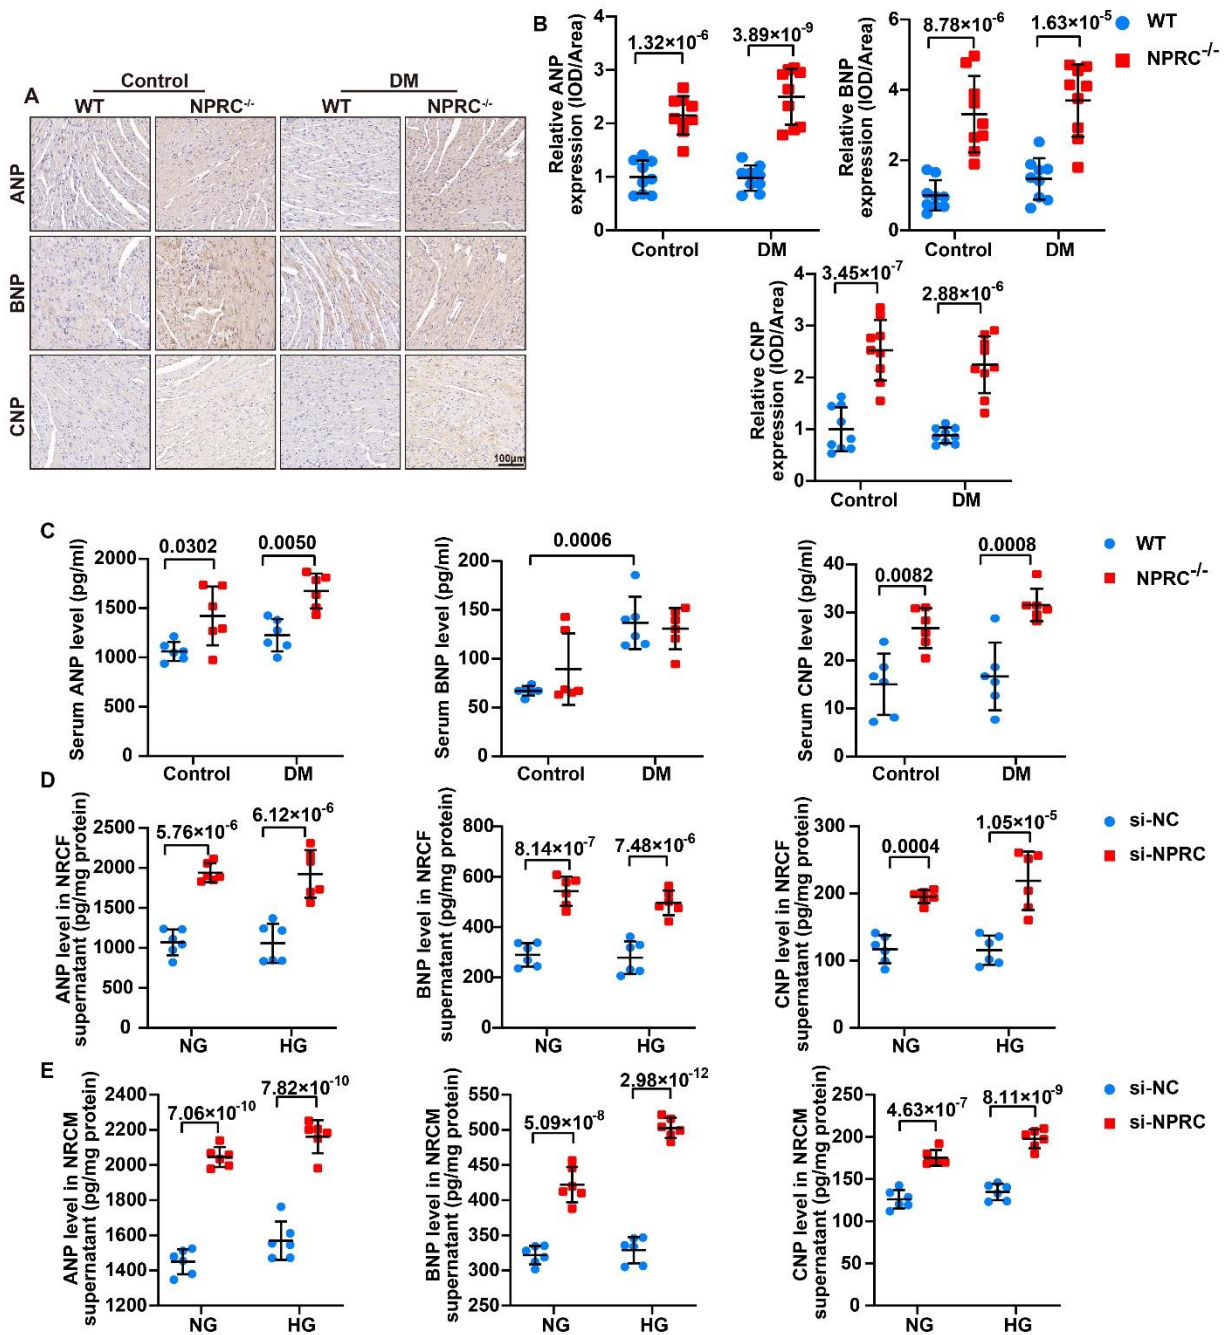

**Fig. S18. NPRC deficiency increased NP levels *in vivo* and *in vitro*.** (A) Representative IHC images of ANP, BNP, and CNP in the hearts of four groups of mice. Bar = 100  $\mu$ m. (B) Quantification of IHC staining of ANP, BNP, and CNP in (A). n = 9 per group. (C) Quantification of serum levels of ANP, BNP, and CNP in four groups of mice. n = 6 per group. (D) ANP, BNP, and CNP levels in cell supernatant of NRCFs transfected with si-NC or si-NPRC and treated with NG or HG. n = 6 per group. (E) ANP, BNP, and CNP levels in cell supernatant of NRCMs transfected with si-NC or si-NPRC and treated

with NG or HG. n = 6 per group. DM: diabetes mellitus; NG: normal glucose; HG: high glucose. Normal distributions were tested by Shapiro-Wilk method. Two-way ANOVA with Bonferroni post-hoc test was used in (B-E).

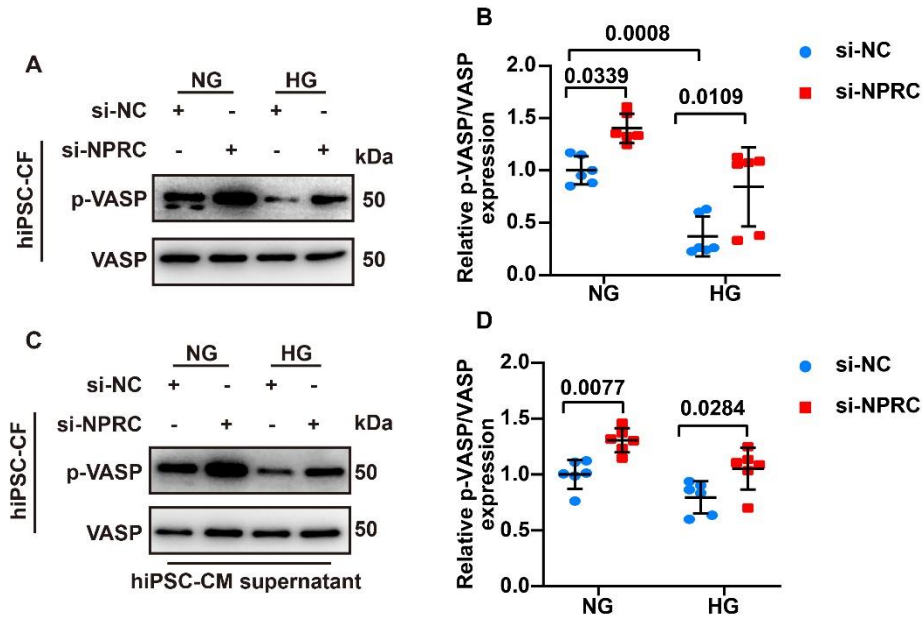

**Fig. S19. NPRC deficiency activated cGMP/PKG signaling in hiPSC-CFs. (A-B)** Representative Western blot images and quantification of the protein expression of p-VASP in hiPSC-CFs transfected with si-NC or si-NPRC and treated with NG or HG. n = 6 per group. **(C-D)** Representative Western blot images and quantification of the protein expression of p-VASP in hiPSC-CFs treated with the supernatant of hiPSC-CMs. n = 6 per group. NG: normal glucose; HG: high glucose. Normal distributions were tested by Shapiro-Wilk method. Two-way ANOVA with Bonferroni post-hoc test was used in **(B)**, and **(D)**.

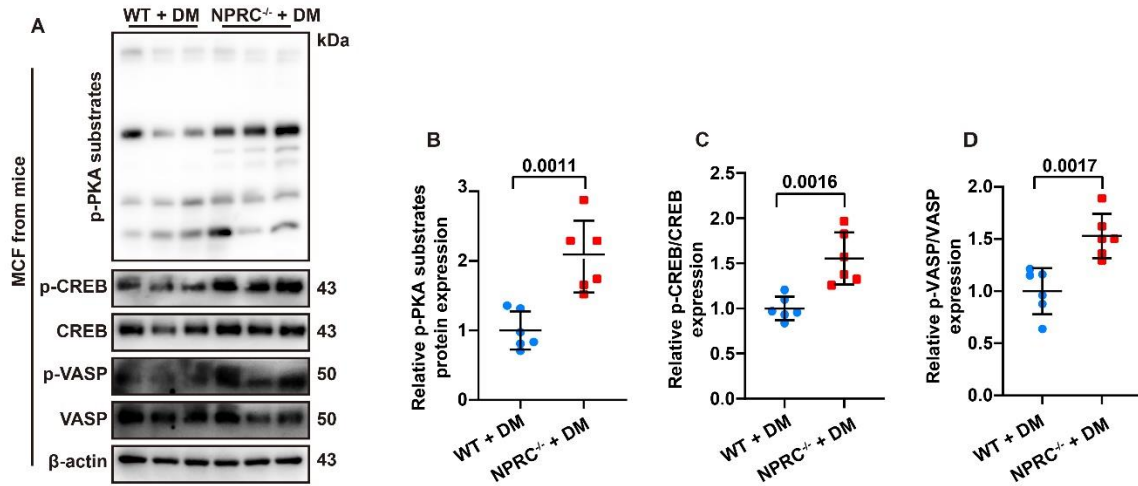

**Fig. S20. NPRC deficiency activated cAMP/PKA and cGMP/PKG signaling in adult mouse CFs (MCF).** (A). Representative Western blot images of p-PKA substrates, p-CREB, and p-VASP of adult MCFs isolated from the hearts of diabetic WT and NPRC<sup>-/-</sup> mice. (B-D). Quantification of the protein expression of p-PKA substrates, p-CREB, and p-VASP in (A). n = 6 per group. DM: diabetes mellitus; Normal distributions were tested by Shapiro-Wilk method. Unpaired two-tailed Student's t tests were applied in (B-D).

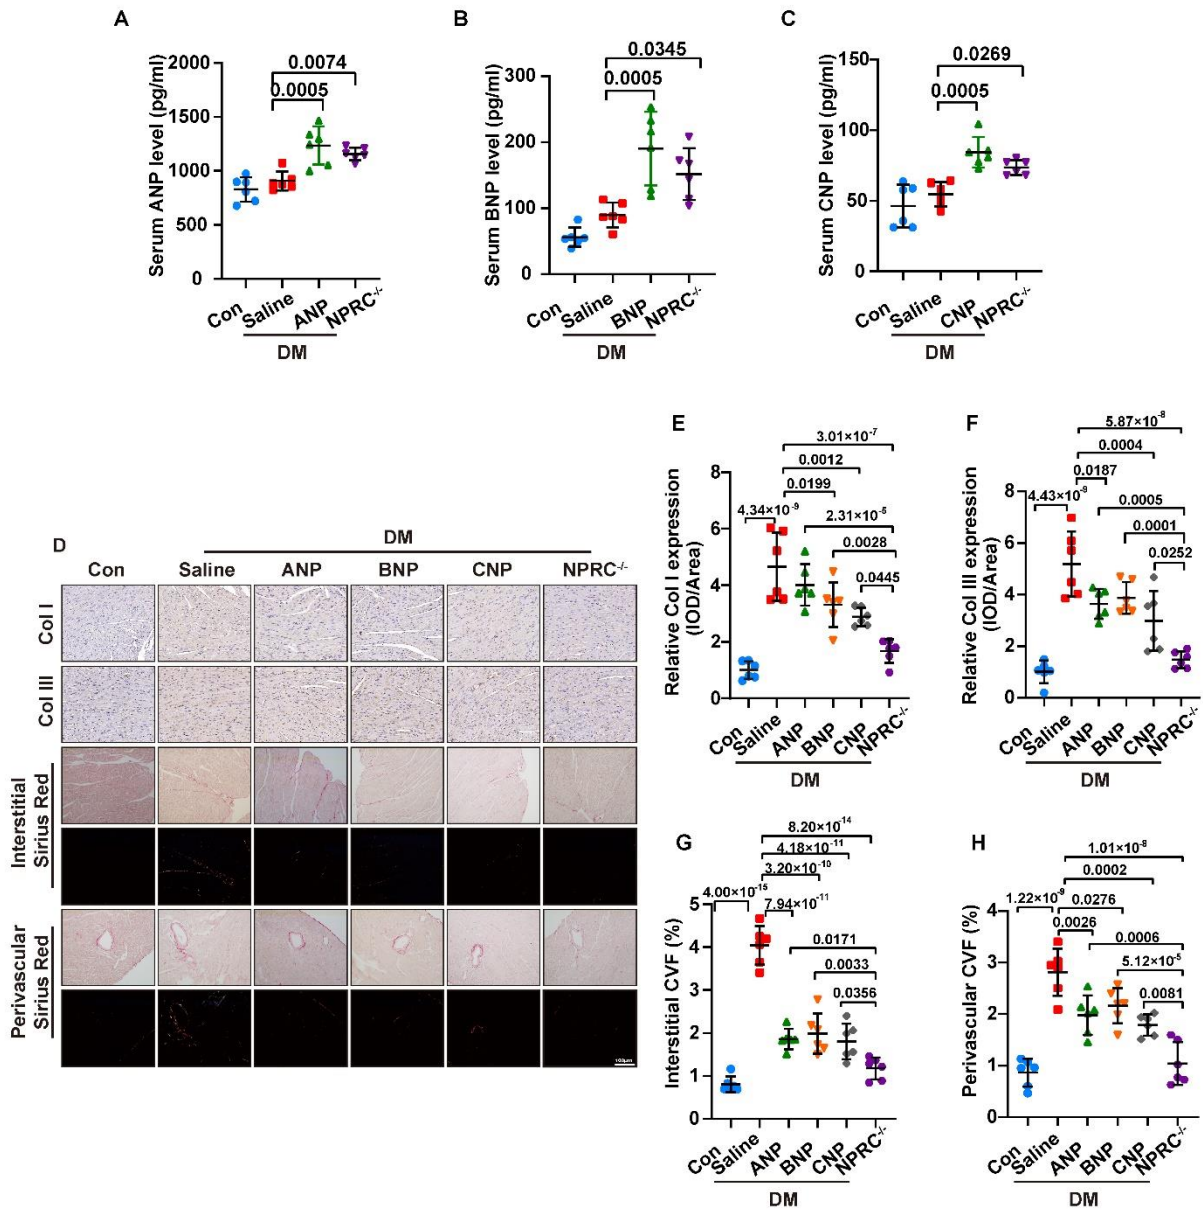

**Fig. S21. Comparison of cardioprotective effects between NPRC deletion and ANP, BNP, or CNP infusion in diabetic mice. (A)** Serum levels of ANP in Con, DM + Saline, DM + ANP, and DM + NPRC<sup>-/-</sup> mice. **(B)** Serum levels of BNP in Con, DM + Saline, DM + BNP, and DM + NPRC<sup>-/-</sup> mice. **(C)** Serum levels of CNP in Con, DM + Saline, DM + CNP, and DM + NPRC<sup>-/-</sup> mice. n = 6 per group. **(D)**. Representative images of IHC (collagen I and collagen III on the first and the second row) and the Sirius red staining (the third to the bottom row) of the myocardium in six groups of mice. Bar = 100  $\mu$ m. **(E-H)** Quantification of collagen I and collagen III expression, interstitial collagen volume



fraction (CVF), and perivascular CVF in (D). Col I: Collagen I; Col III: Collagen III. Normal distributions were tested by Shapiro-Wilk method. One-way ANOVA was used.

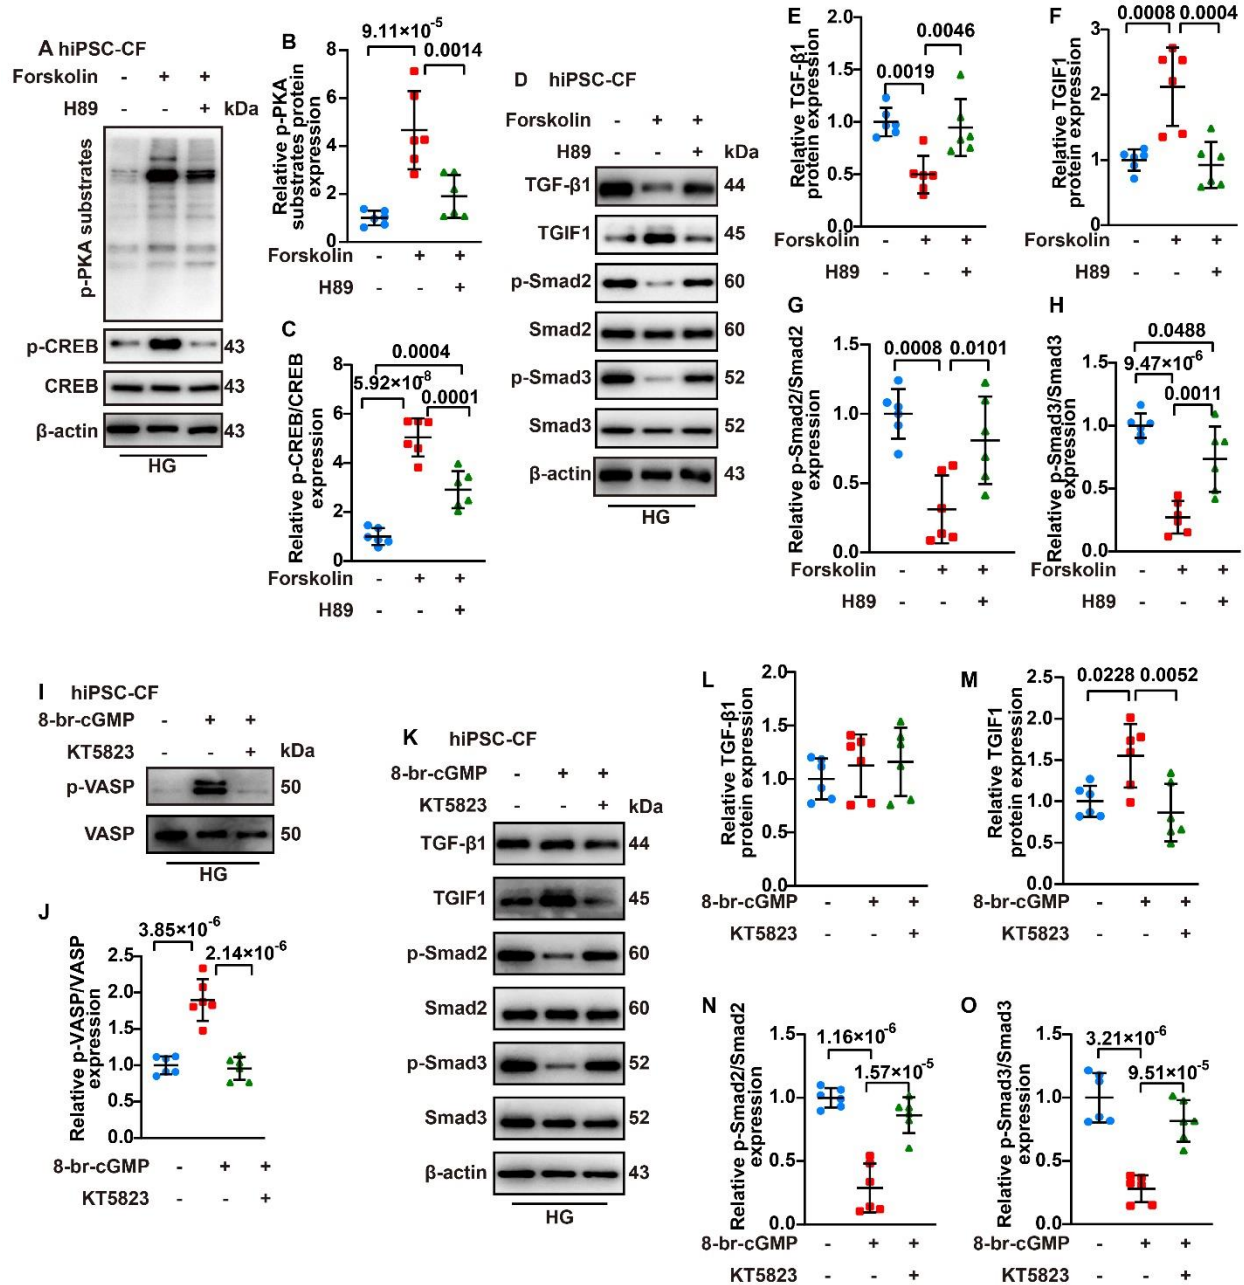

**Fig. S22. Activation of cAMP/PKA or cGMP/PKG signaling increased TGIF1 expression but cAMP/PKA activation inhibited TGF-β1 expression in hiPSC-CFs. (A)** Representative Western blot images of p-PKA substrates and p-CREB expression in

hiPSC-CFs which were treated with either forskolin or forskolin combined with H89 followed by HG treatment. **(B-C)** Quantification of the protein expression of p-PKA substrates and p-CREB in **(A)**. n = 6 per group. **(D)** Representative Western blot images of TGF- $\beta$ 1, TGIF1, p-Smad2, and p-Smad3 expression in hiPSC-CFs which were treated with either forskolin or forskolin combined with H89 followed by HG treatment. **(E-H)** Quantification of the protein expression of TGF- $\beta$ 1, TGIF1, p-Smad2, and p-Smad3 in **(D)**. n = 6 per group. **(I)** Representative Western blot images of p-VASP in hiPSC-CFs treated with either 8-br-cGMP or 8-br-cGMP combined with KT5823 followed by HG treatment. **(J)** Quantification of the protein expression of p-VASP in **(I)**. n = 6 per group. **(K)** Representative Western blot images of TGF- $\beta$ 1, TGIF1, p-Smad2, and p-Smad3 expression in hiPSC-CFs treated with either 8-br-cGMP or 8-br-cGMP combined with KT5823 followed by HG treatment. **(L-O)** Quantification of the protein expression of TGF- $\beta$ 1, TGIF1, p-Smad2, and p-Smad3 in **(K)**. n = 6 per group. HG: high glucose. Normal distributions were tested by Shapiro-Wilk method. One-Way ANOVA was used in **(B-C, E-H, J, and L-O)**.

**Table S1. Antibodies and manufacturers**

| Antibody            | Company                   | Catalog NO. | Concentrations           |
|---------------------|---------------------------|-------------|--------------------------|
| NPRC                | GeneTex                   | GTX110023   | WB: 1:1000<br>IF: 1:200  |
|                     | Origene                   | TA500956    | WB: 1:1000               |
| GCA                 | GeneTex                   | GTX14918    | WB: 1:1000               |
| GCA                 | GeneTex                   | GTX109810   | IF: 1:200                |
| GCB                 | Origene                   | TA351444    | WB: 1:1000<br>IF: 1:200  |
|                     |                           |             |                          |
| Collagen I          | Proteintech               | 66761-1-Ig  | WB: 1:1000               |
| Collagen I          | Abcam                     | ab34710     | IHC: 1:200               |
| Collagen III        | Proteintech               | 22734-1-AP  | WB: 1:1000               |
| Collagen III        | Abcam                     | ab7778      | IHC: 1:200               |
| TGF- $\beta$ 1      | Abcam                     | ab215715    | WB: 1:1000               |
| TGF $\beta$ R2      | Proteintech               | 66636-1-Ig  | WB: 1:1000               |
| p-Smad2             | Cell Signaling Technology | 3108        | WB: 1:1000               |
| Smad2               | Cell Signaling Technology | 5339        | WB: 1:1000               |
| p-Smad3             | Cell Signaling Technology | 9520        | WB: 1:1000               |
| Smad3               | Cell Signaling Technology | 9523        | WB: 1:1000               |
| PCNA                | SantaCruz                 | sc-56       | WB: 1:100                |
| TGIF1               | Abcam                     | ab52955     | WB: 1:1000               |
| cPML                | Abcam                     | ab179466    | WB: 1:1000<br>IF: 1:200  |
|                     |                           |             |                          |
| cPML                | SantaCruz                 | sc-377390   | IP: 1 $\mu$ g/ml         |
| Lamin B             | Proteintech               | 12987-1-AP  | WB: 1:1000               |
| p-PKA<br>substrates | Cell Signaling Technology | 9621        | WB: 1:1000<br>IHC: 1:200 |
|                     |                           |             |                          |
| p-CREB              | Cell Signaling Technology | 9198        | WB: 1:1000<br>IHC: 1:500 |
|                     |                           |             |                          |
| CREB                | Cell Signaling Technology | 9197        | WB: 1:1000               |
| p-VASP              | Cell Signaling Technology | 3114        | WB: 1:1000               |

|                |                           |           |            |
|----------------|---------------------------|-----------|------------|
| p-VASP         | Abcam                     | ab194747  | IHC: 1:200 |
| VASP           | Cell Signaling Technology | 3112      | WB: 1:1000 |
| ANP            | GeneTex                   | GTX109255 | IHC: 1:200 |
| BNP            | Abcam                     | ab243400  | IHC: 1:200 |
| CNP            | Genetax                   | GTX55996  | IHC: 1:200 |
| $\beta$ -actin | Abcam                     | ab8227    | WB: 1:1000 |

**Table S2. Sequence of primers and siRNAs**

| <b>Primers</b>                  | <b>Sequence (5'-3')</b>                                        |
|---------------------------------|----------------------------------------------------------------|
| <i>npr3</i>                     | forward: ATCGAGAGCTGCCGGAAGAT<br>reverse: TCAAGCAGACAAAGCAAGGG |
| <i>npr1</i>                     | forward: CATTGAGCGTGTGACTCGGG<br>reverse: GCGAATCTGCTGAAAGGGTG |
| <i>npr2</i>                     | forward: TGGGCACGGGAATCACTTTC<br>reverse: GAGCGAGCCGTAAGTGGAT  |
| <i>tgif1</i>                    | forward: TCAGTTCACCATTTCCCGCC<br>reverse: GGAGGTTTGGGAGACACTGG |
| <i><math>\beta</math>-actin</i> | forward: GCAGGAGTACGATGAGTCCG<br>reverse: ACGCAGCTCAGTAACAGTCC |
| <b>siRNAs</b>                   | <b>Sequence (5'-3')</b>                                        |
| negative control                | UUCUCCGAACGUGUCACGUTT                                          |
| NPRC<br>(SR502884A)             | GCUCUACAGCGACGACAAACUCGAG                                      |
| NPRC<br>(SR502884B)             | GCGAUCCAAUGUCAAAUAUCCUUGG                                      |
| NPRC<br>(SR502884C)             | GGCCUAGAAGAAUCAGCAGUGACAG                                      |
| TGIF1                           | UGUUGUUGCAGCAGCAUUUTT                                          |
